# Supplementary material for: Direct Binding of the Flexible C-Terminal Segment of Periaxin to β4 Integrin Suggests a Molecular Basis for CMT4F
Source: PubMed Central journal article supplement (PMC6465933; doi:10.3389/fnmol.2019.00084), 2019-04-09
Supplement: Data_Sheet_1.pdf [file Data_Sheet_1.pdf]

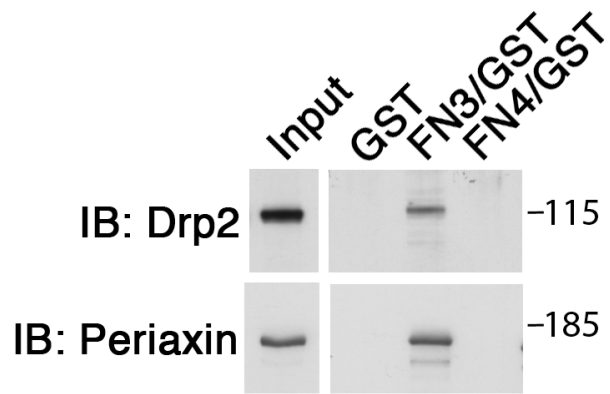

**Supplementary Figure S1.  $\beta$ 4-FNIII-3 pulls down PRX and the associated DRP2 *in vitro*.** GST or a GST- $\beta$ 4-FNIII-3 (FN3/GST) fusion protein were incubated with a sciatic nerve lysate *in vitro* and bound L-PRX or DRP2 were detected by Western blotting (IB). GST- $\beta$ 4-FNIII-4 (FN4/GST) failed to pull down PRX and DRP2.

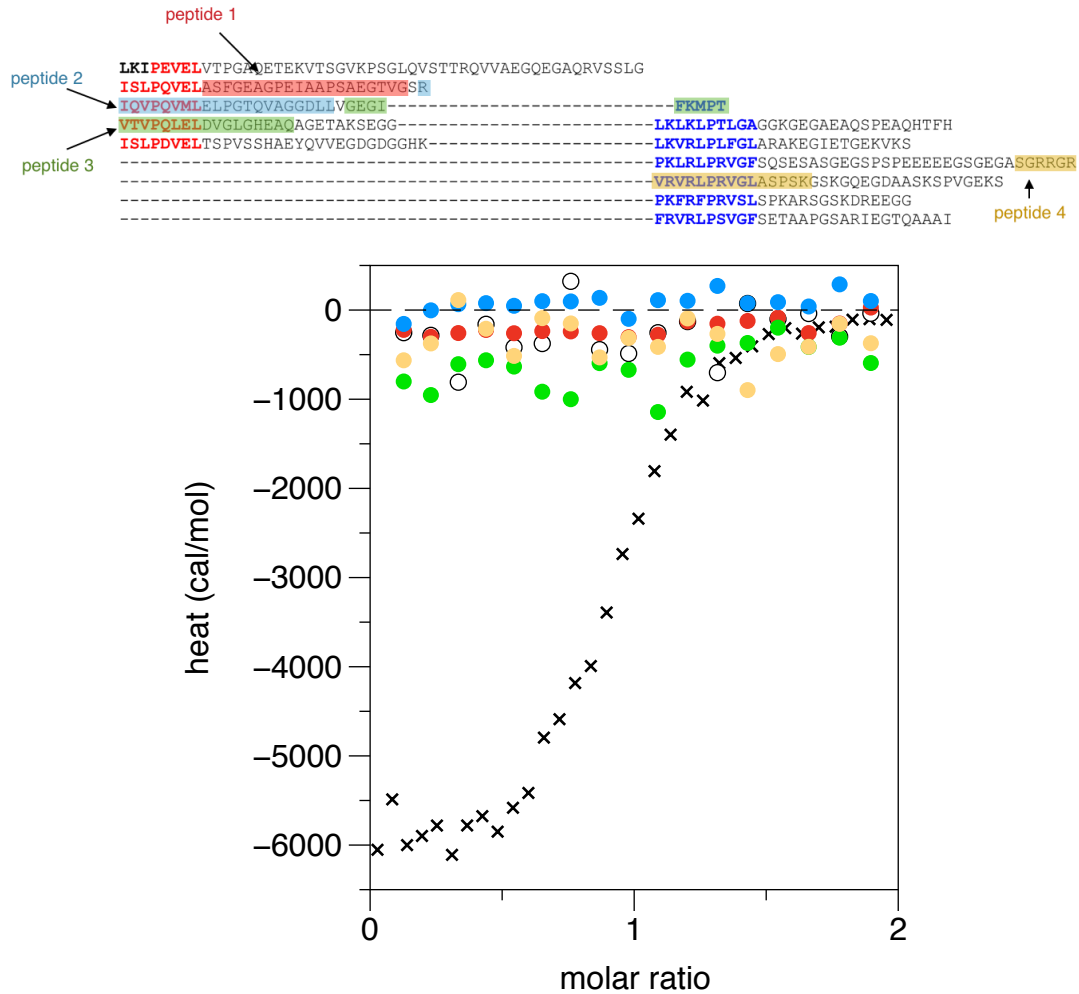

**Supplementary Figure S2. ITC screening of potential  $\beta$ 4-FNIII-3 binding peptides from L-PRX.** Top panel: location of the selected peptides in the PRX-C region (compare to Figure 2B). The peptides correspond to a non-repeat region (peptide 1), a region homologous to a segment of  $\beta$ 4-FNIII-3 (peptide 2), an acidic repeat (peptide 3), and a basic repeat (peptide 4). Bottom panel: ITC results. For comparison, the ITC data from the titration with the full PRX-C construct (Figure 2D) is shown (black crosses). Open circles, buffer control. Peptide colours as in top panel. None of the peptides show detectable binding to  $\beta$ 4-FNIII-3.

**Supplementary Table S1. SAXS modelling.** While the MONSA run generated one model using all 3 datasets, the SASREF run performed rigid body fitting of the  $\beta$ 4-FNIII-3 crystal structure and the PRX-C GASBOR model to the complex SAXS data.

| software | sample            | chi <sup>2</sup> | data range ( $\text{\AA}^{-1}$ ) |
|----------|-------------------|------------------|----------------------------------|
| GASBOR   | PRX-C             | 1.20             | 0.007-0.1405                     |
| MONSA    | PRX-C             | 6.49             | 0.004-0.2454                     |
|          | $\beta$ 4-FNIII-3 | 2.51             |                                  |
|          | complex           | 4.58             |                                  |
| SASREF   | complex           | 1.46             | 0.004 - 0.4415                   |
| EOM      | PRX-C             | 0.735            | 0.004 - 0.4415                   |
